# Supplementary material for: Structural basis of tubulin recruitment and assembly by microtubule polymerases with tumor overexpressed gene (TOG) domain arrays
Source: eLife journal article supplement (doi:10.7554/elife.38922), 2018-11-13
Supplement: supp [file elife_poa_e38922_Figure_5_figure_supplement_2.pdf › elife_poa_e38922_Figure_5_figure_supplement_2.pdf]

**A** Sk-Alp14-monomer:tubulin:DRPΔN crystals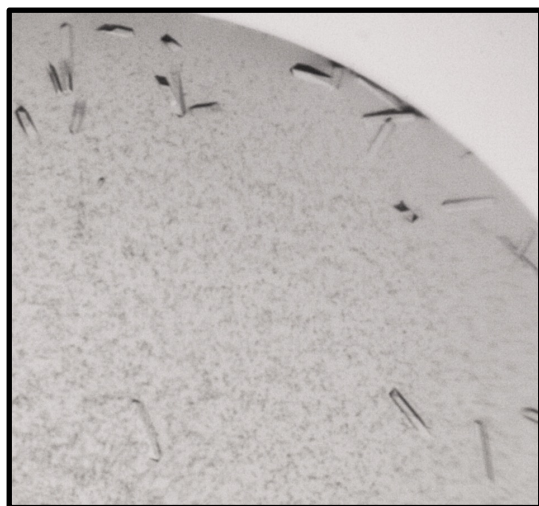**B** Molecular Replacement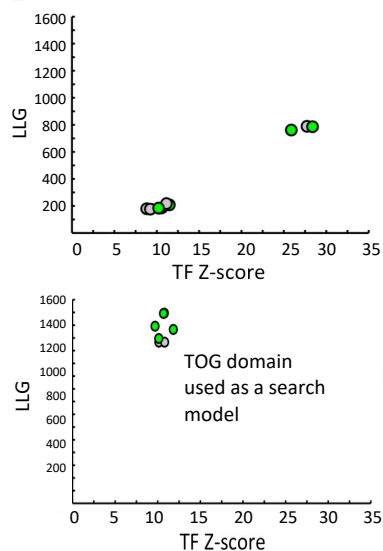**C** Map of 1:2:1 complex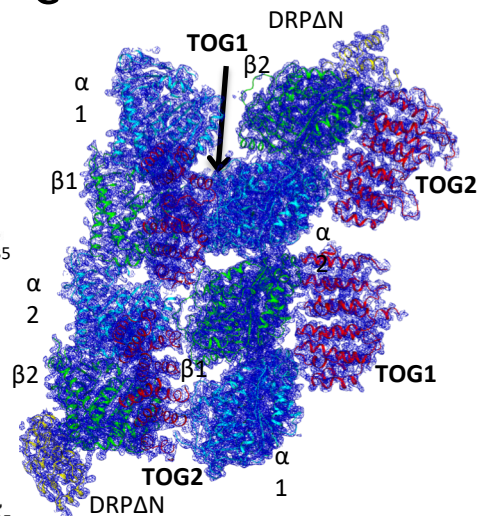**D** Packing in the crystallographic unit cell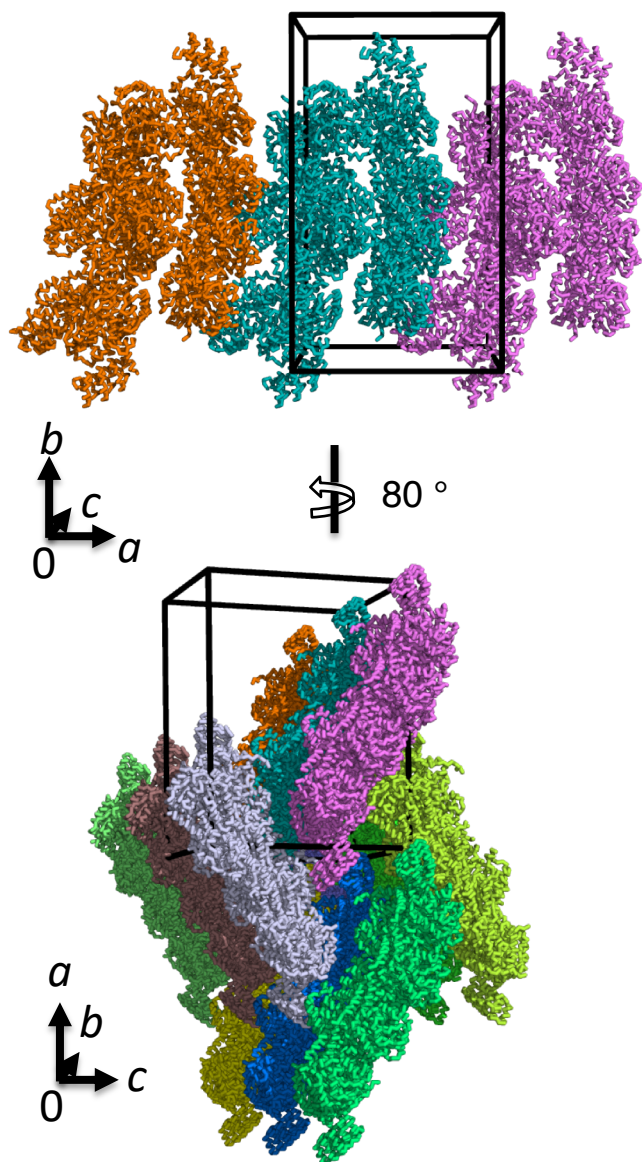**E**  $\alpha\beta$ -tubulins are highly curved in the Sk-Alp14-monomer:tubulin:DRPΔN structure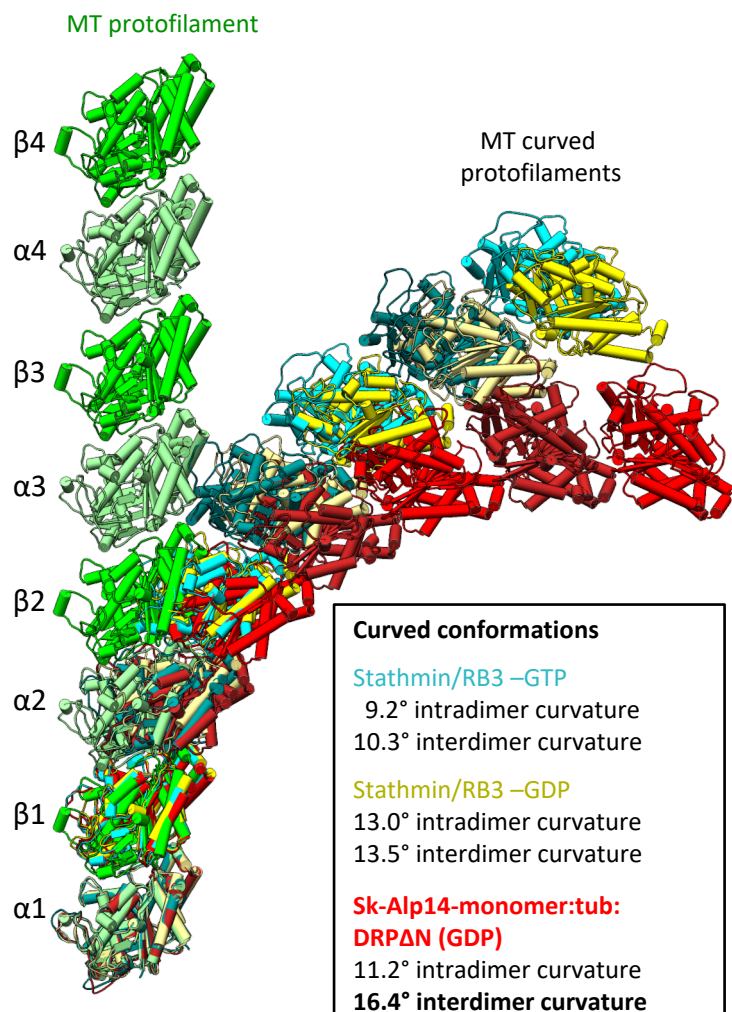**Curved conformations****Stathmin/RB3 -GTP**

9.2° intradimer curvature  
10.3° interdimer curvature

**Stathmin/RB3 -GDP**

13.0° intradimer curvature  
13.5° interdimer curvature

**Sk-Alp14-monomer:tub: DRPΔN (GDP)**

11.2° intradimer curvature  
16.4° interdimer curvature
