# Supplementary material for: Structural basis of tubulin recruitment and assembly by microtubule polymerases with tumor overexpressed gene (TOG) domain arrays
Source: eLife journal article supplement (doi:10.7554/elife.38922), 2018-11-13
Supplement: supp [file elife_poa_e38922_Supplementary_File_1.docx]

**Supplementary File 1**: The stoichiometry for MT polymerases TOG1-TOG2 binding αβ-tubulin and DARPin (DRP)

| **Protein complex** | **Expected Mass (kDa)** | **SEC-MALS Measured**  **Mass**  **(kDa)** | **SEC**  **elution**  **volume**  **(mL)** | **Apparent**  **Mass (kDa)** |
| --- | --- | --- | --- | --- |
| αβ-Tubulin | 100 kDa | 98 ± 0.323* | 12.9 | 104 |
| Alp14-dimer | 150 kDa | 143 ± 1.70 | 10.0 | 675 |
| 1 Alp14-dimer: 1 Tubulin 80 mM KCl | 350 kDa | 387 ± 2.74 | 9.27 | 463 |
| 1 Alp14-dimer: 2 Tubulin 80 mM KCl | 550 kDa | 578 ± 1.41 | 8.98 | 784 |
| 1 Alp14-dimer: 1Tubulin 200 mM KCl | 350 kDa | 304 ± 11.8 | 9.22 | 693 |
| 1 Alp14-dimer: 2 Tubulin 200 mM KCl | 350 kDa | 392 ± 9.66 | 9.67 | 549 |
| 1 Alp14-dimer-TOG1M: 1 Tubulin 80 mM KCl | 350 kDa | 400 ± 7.3 | 10.13 | 433 |
| 1 Alp14-dimer-TOG2M: 2 Tubulin 80 mM KCl | 350 kDa | 382 ± 14 | 9.76 | 524 |
| Alp14-monomer | 62 kDa | 77.8 ± 1.21 | 12.98 | 99 |
| 1 Alp14-monomer: 2 Tubulin 80 mM KCl | 262 kDa | 264 ± 1.31 | 11.17 | 253 |
| 1 Alp14-monomer: 2 Tubulin: 2 DRP 80mM KCl | 298 kDa | 312 ± 2.32 | 10.94 | 285 |
| 1 Alp14-dimer-INT1: 2 Tubulin 80mM KCl | 550 kDa | 533 ± 3.11 | 8.95 | 775 |
| 1 Alp14-dimer-INT2: 2 Tubulin 80mM KCl | 550 kDa | 580 ± 3.11 | 8.90 | 770 |
| 1 Alp14-dimer-INT1+2: 2 Tubulin 80mM KCl | 550 kDa | 540 ± 3.22 | 8.80 | 790 |

*Standard error is defined based on fitting data across peaks using Astra-software
