# Supplementary material for: Structural basis of tubulin recruitment and assembly by microtubule polymerases with tumor overexpressed gene (TOG) domain arrays
Source: eLife journal article supplement (doi:10.7554/elife.38922), 2018-11-13
Supplement: supp [file elife_poa_e38922_Supplementary_File_4.docx]

**Supplementary File 4**: Buried Surface Area between αβ-tubulin dimer and TOG domains or DRP

| **Interface** | **1:2:2: sk-Alp14-monomer:**  **αβ-Tubulin: DRP(Å2)*** | | **1:2:2: sk-Alp14-monomer-SL:**  **αβ-Tubulin: DRP (Å2)** | | **1:2:1: sk-Alp14-monomer:**  **αβ-Tubulin: DRP-ΔN (Å2)** |
| --- | --- | --- | --- | --- | --- |
| TOG1 and TOG2-interface 2 | | 273 ± 35 | 257 ± 42 | - | |
| TOG1-TOG2 dimer-interface 1 | | 661 ± 27 | 702 ± 18 | - | |
| αβ-tubulin and TOG1 | | 752 ± 12 | 786 ± 42 | 804 ± 24 | |
| αβ-tubulin and TOG2 | | 916 ± 23 | 890 ± 22 | 863 ± 12 | |
| β-tubulin and DRP or DRP-ΔN | | 842 ± 68 | 873 ± 21 | 846 ± 20 | |
| α-tubulin and DRP  (inter-αβ-tubulin subunit) | | 108 ± 47 | 81 ± 31 | - | |

* Interface areas were determined by a single buried surface, and averaged among each non-crystallographic unit in the structure
