# Supplementary material for: Structural basis of tubulin recruitment and assembly by microtubule polymerases with tumor overexpressed gene (TOG) domain arrays
Source: eLife journal article supplement (doi:10.7554/elife.38922), 2018-11-13
Supplement: supp [file elife_poa_e38922_Supplementary_File_5.docx]

**Supplementary File 5:** Intra and inter dimer curvature angles (**°**) of αβ-Tubulins observed in structures

|  | **PDB ID** | **Intra dimer (α1β1) angle (°)** | | **Inter dimer (β1α2) angle (°)** |
| --- | --- | --- | --- | --- |
| Stathmin:RB3 complex with GTP | 3RYH | 9.2 | 10.3 | | |
| Stathmin:RB3 complex with GDP | 1SA0 | 13.0 | 13.5 | | |
| αβ-tubulin:TOG1 complex with GTP | 4FFB | 13 | - | | |
| αβ-Tubulin:TOG2 complex with GTP | 4U3J | 13 | - | | |
| αβ-Tubulin:DRP complex with GDP | 4DRX | 11.0 | - | | |
| Sk-Alp14-monomer:αβ-Tubulin:DRP wheel with GDP | Current | 11.3 | - | | |
| Sk-Alp14-monomer:αβ-Tubulin:DRP-ΔN with GDP | Current | 11.2 | 16.4 | | |

* Curvature of αβ-tubulin interface were determined as previously described by Rice and Brouhard 2015.
