# Supplementary figures and images for: Structural basis of tubulin recruitment and assembly by microtubule polymerases with tumor overexpressed gene (TOG) domain arrays
Source: eLife journal article supplement (doi:10.7554/elife.38922), 2018-11-13

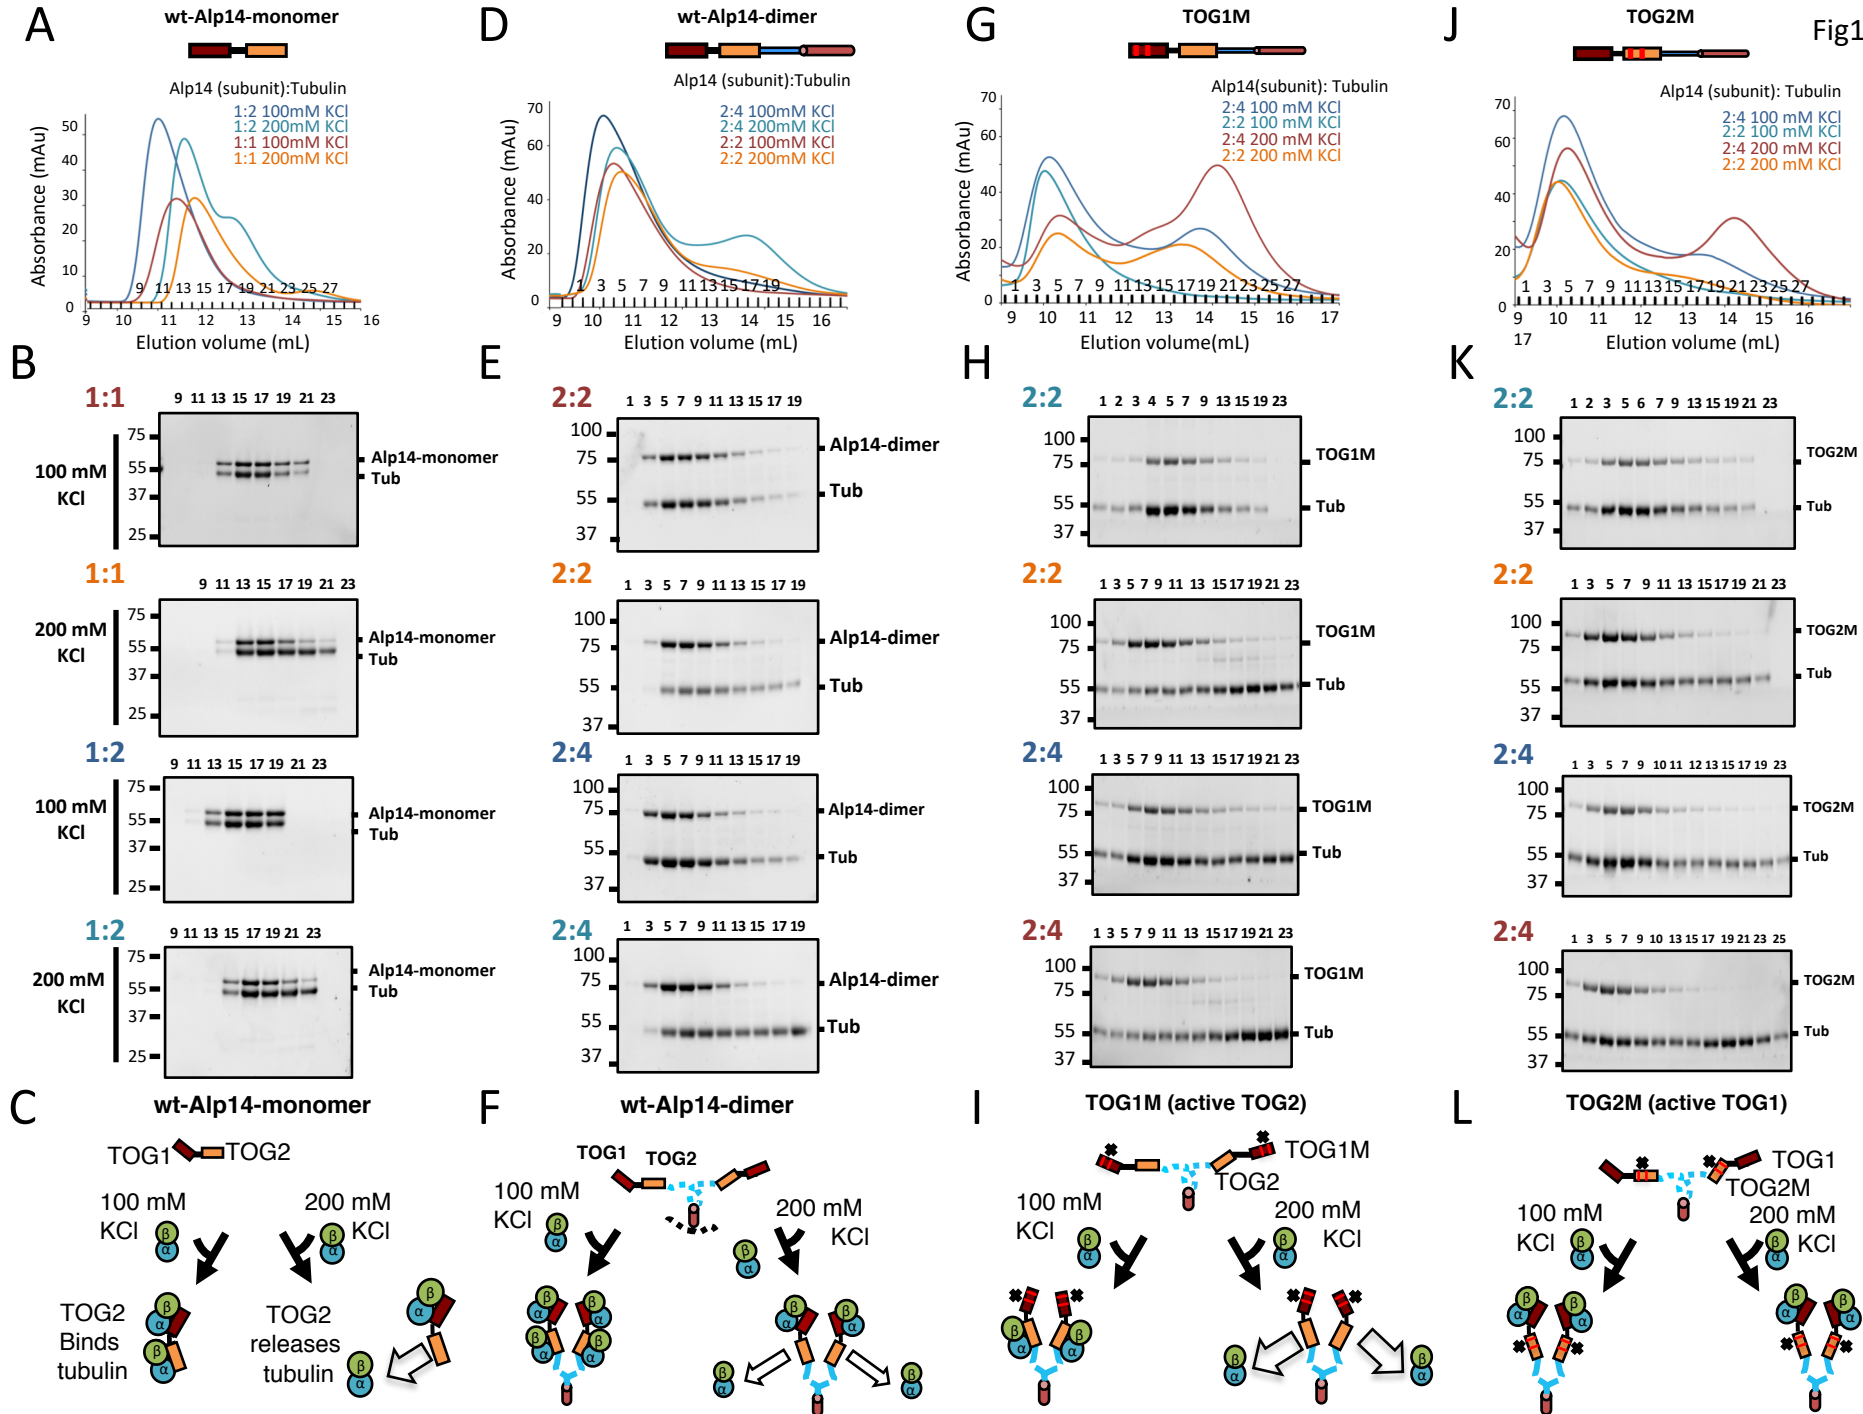

Supplement: supp [file elife_poa_e38922_Figure_1_figure_supplement_1.pdf › elife_poa_e38922_Figure_1_figure_supplement_1.pdf]

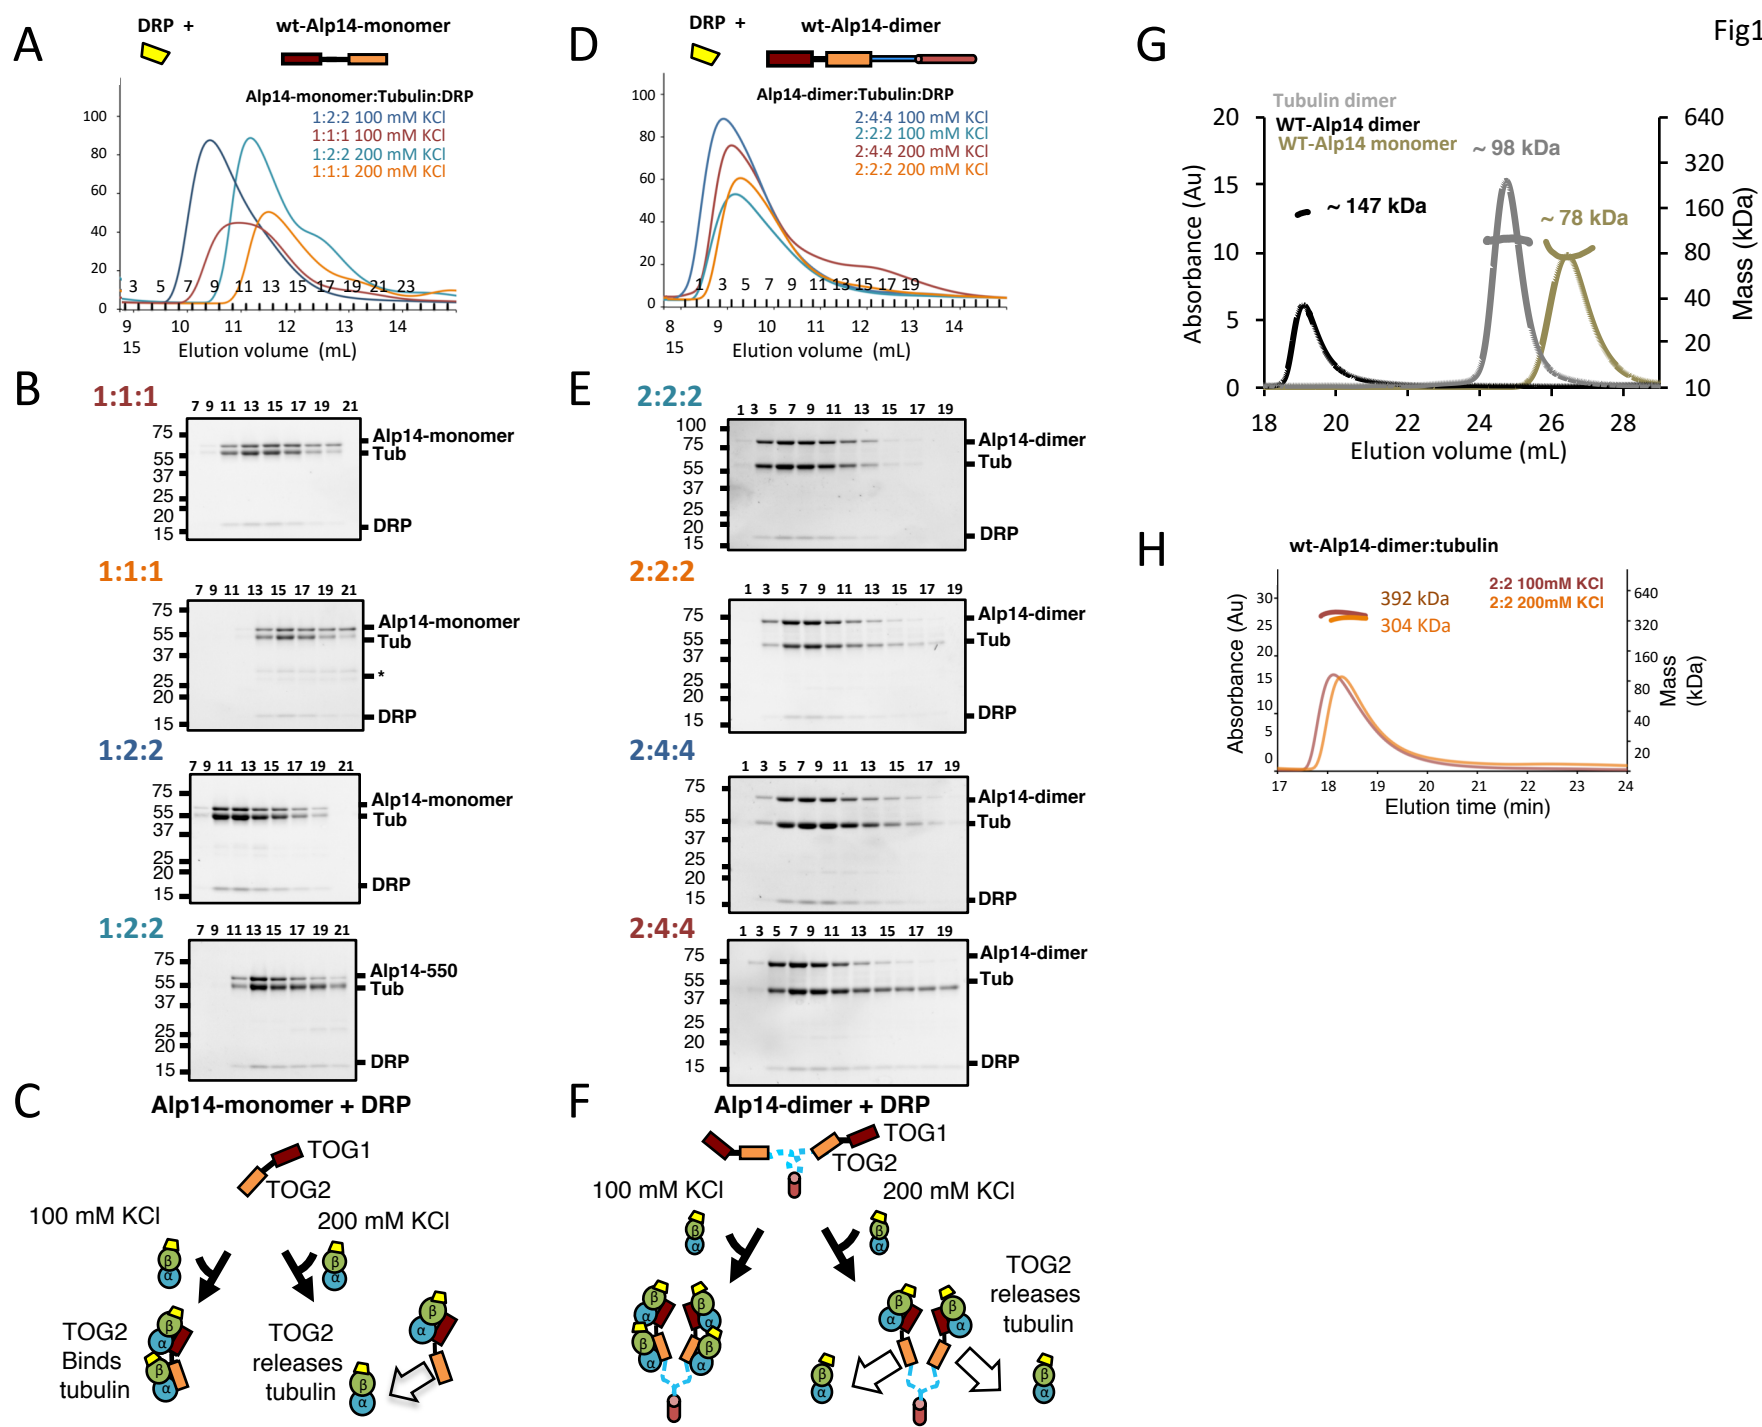

Supplement: supp [file elife_poa_e38922_Figure_1_figure_supplement_2.pdf › elife_poa_e38922_Figure_1_figure_supplement_2.pdf]

A

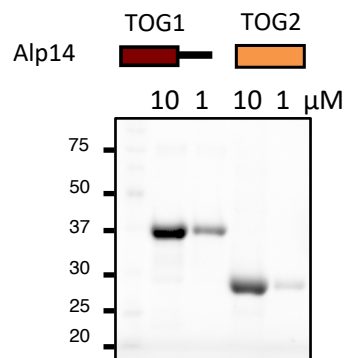

B

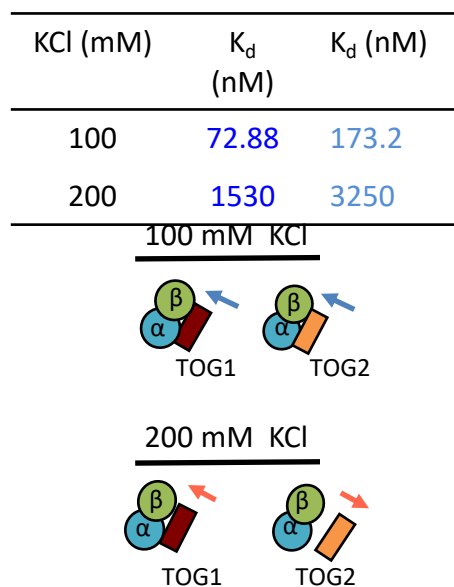

C

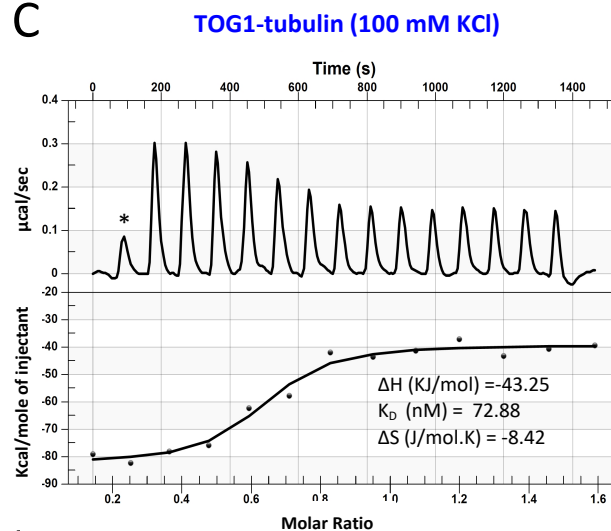

D

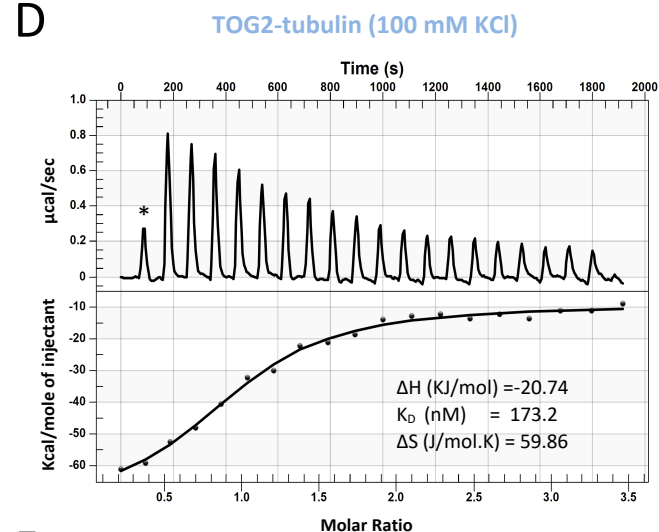

E

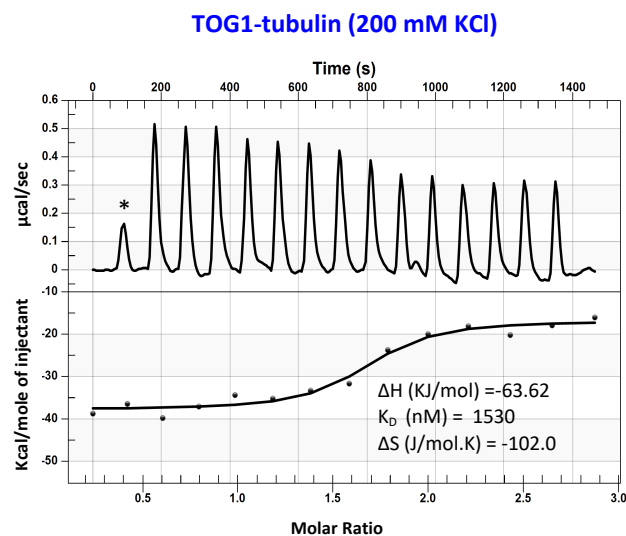

F

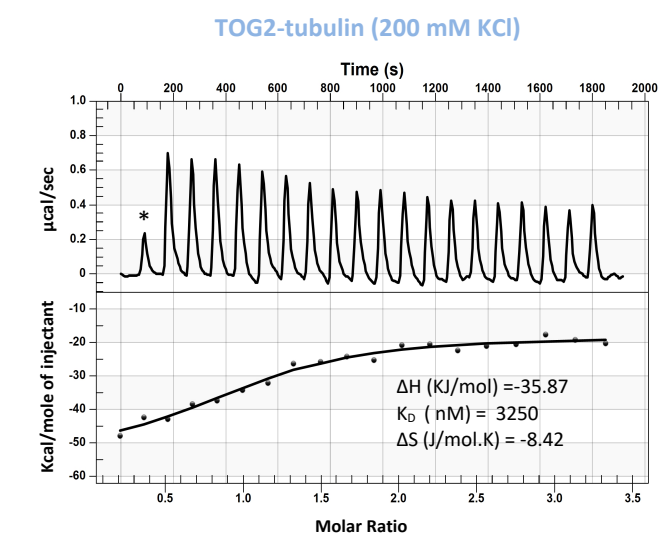

Supplement: supp [file elife_poa_e38922_Figure_1_figure_supplement_3.pdf › elife_poa_e38922_Figure_1_figure_supplement_3.pdf]

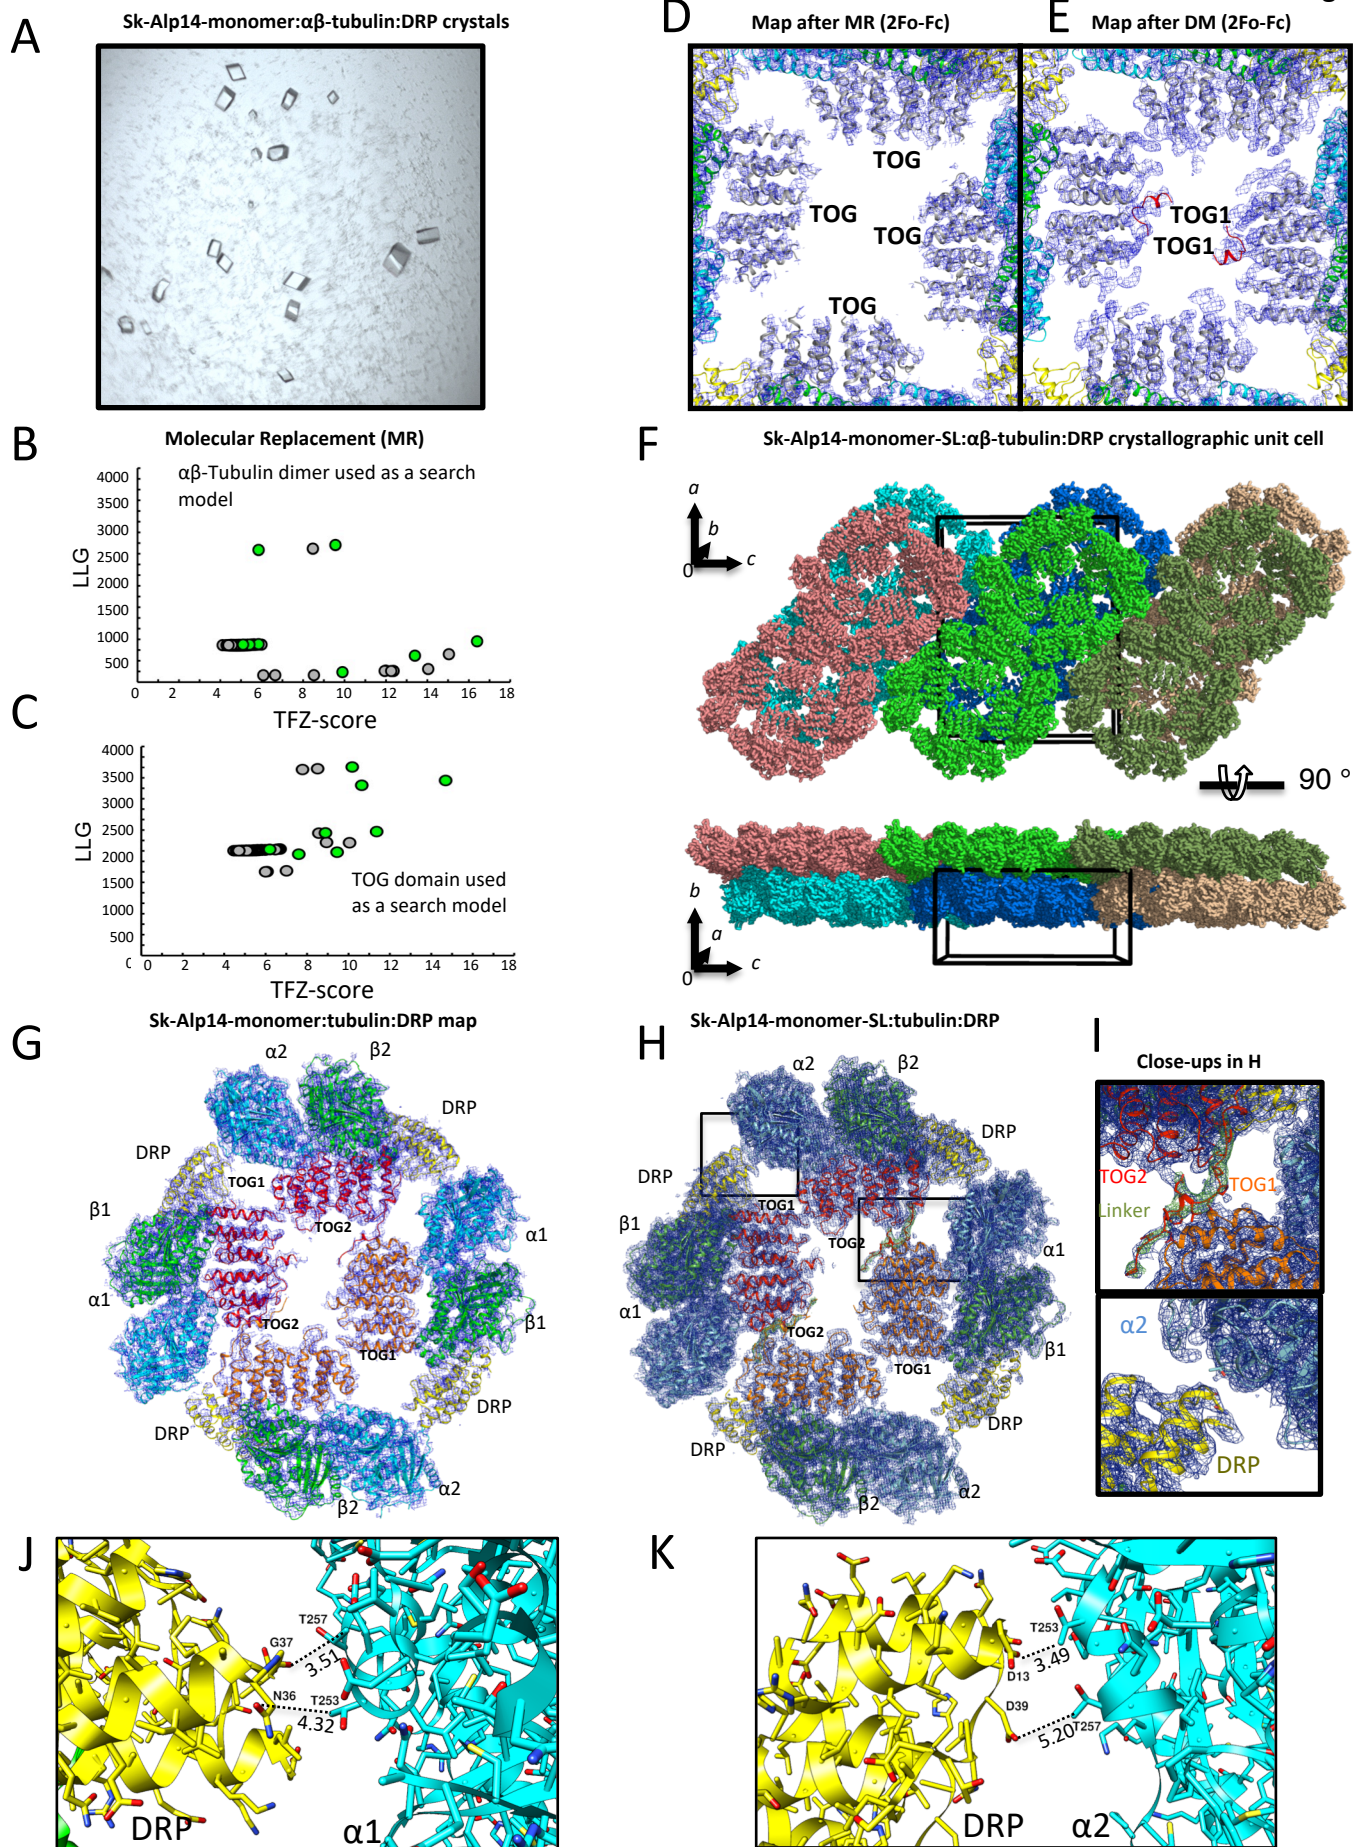

Supplement: supp [file elife_poa_e38922_Figure_2_figure_supplement_1.pdf › elife_poa_e38922_Figure_2_figure_supplement_1.pdf]

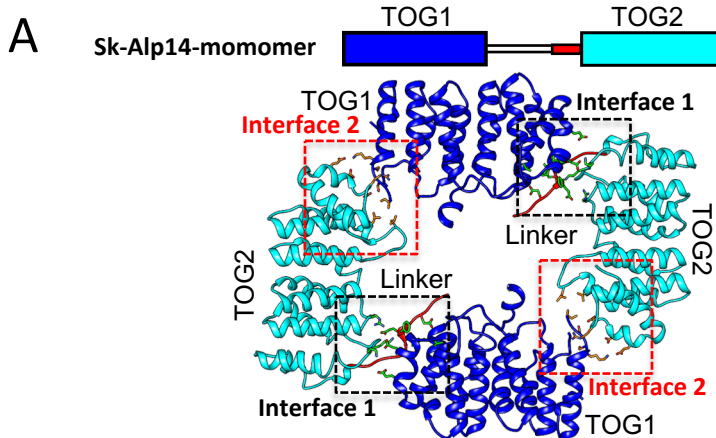**B**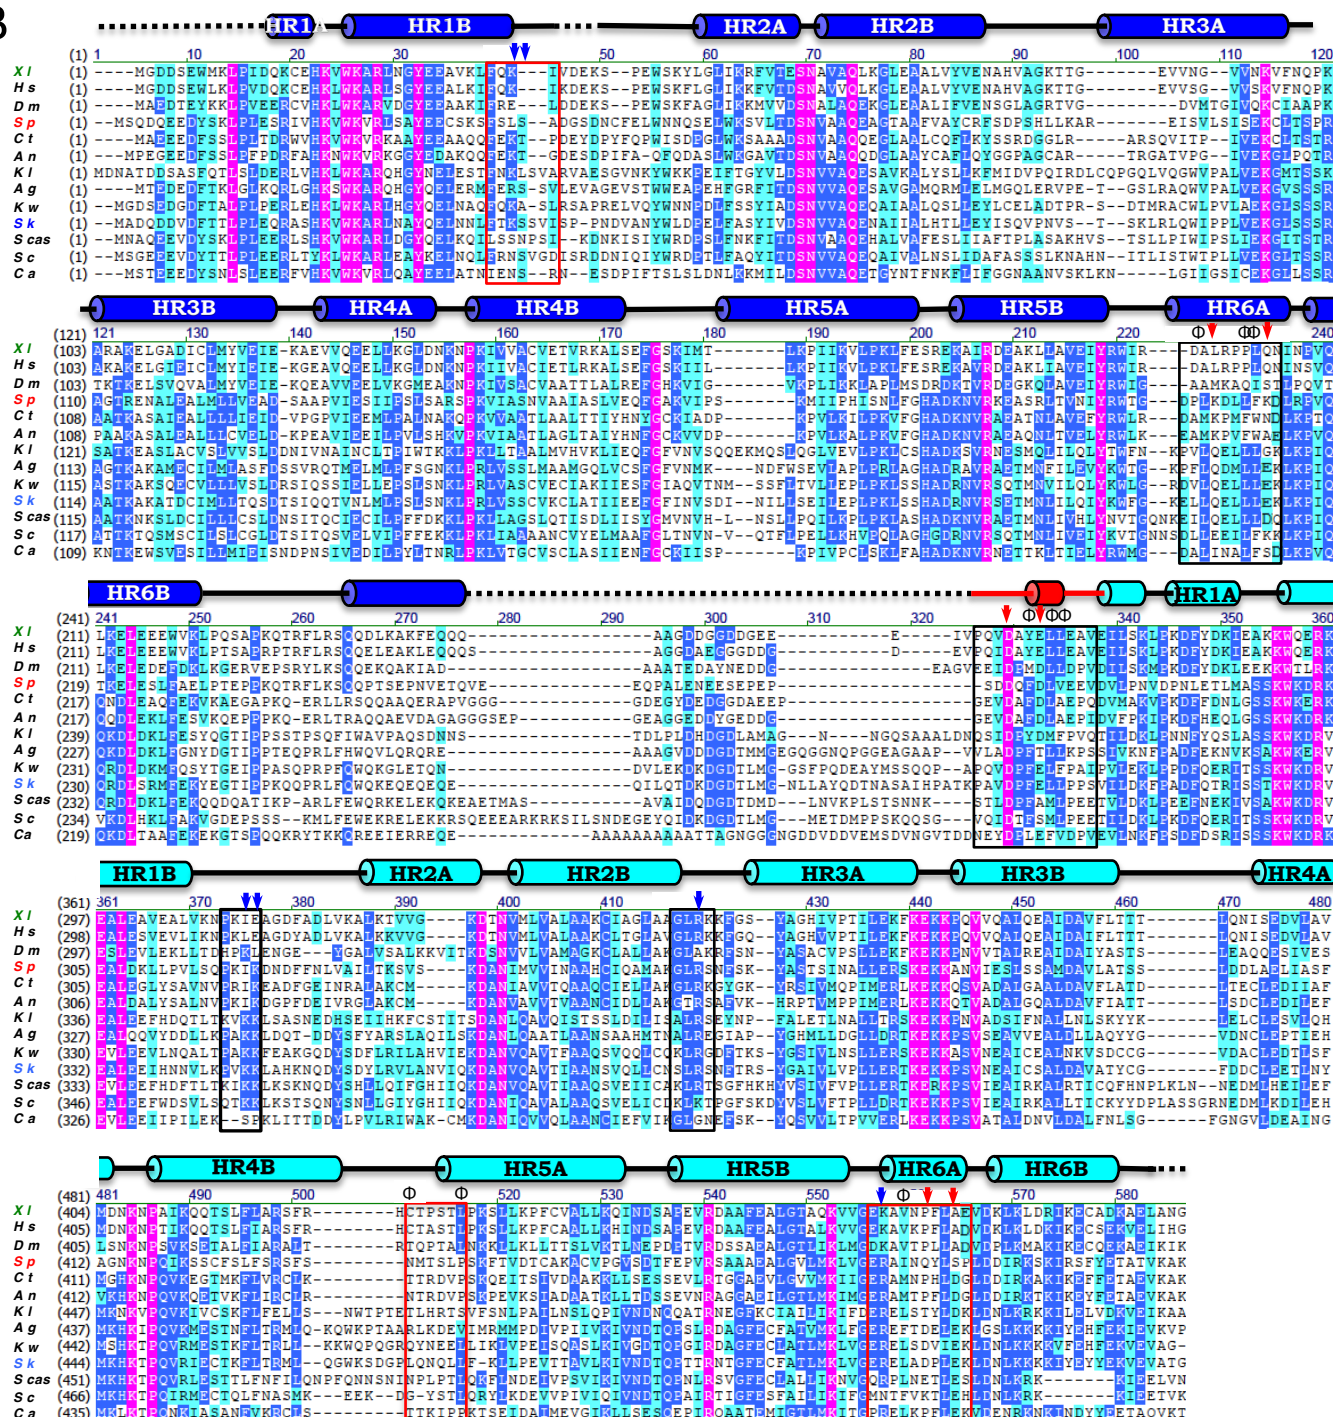

Supplement: supp [file elife_poa_e38922_Figure_2_figure_supplement_2.pdf › elife_poa_e38922_Figure_2_figure_supplement_2.pdf]

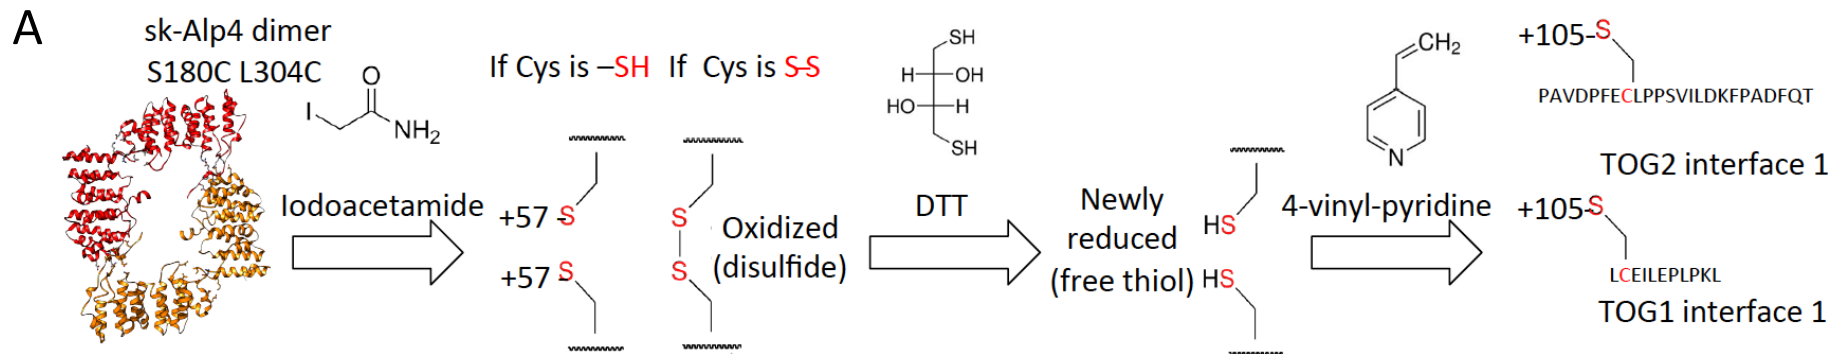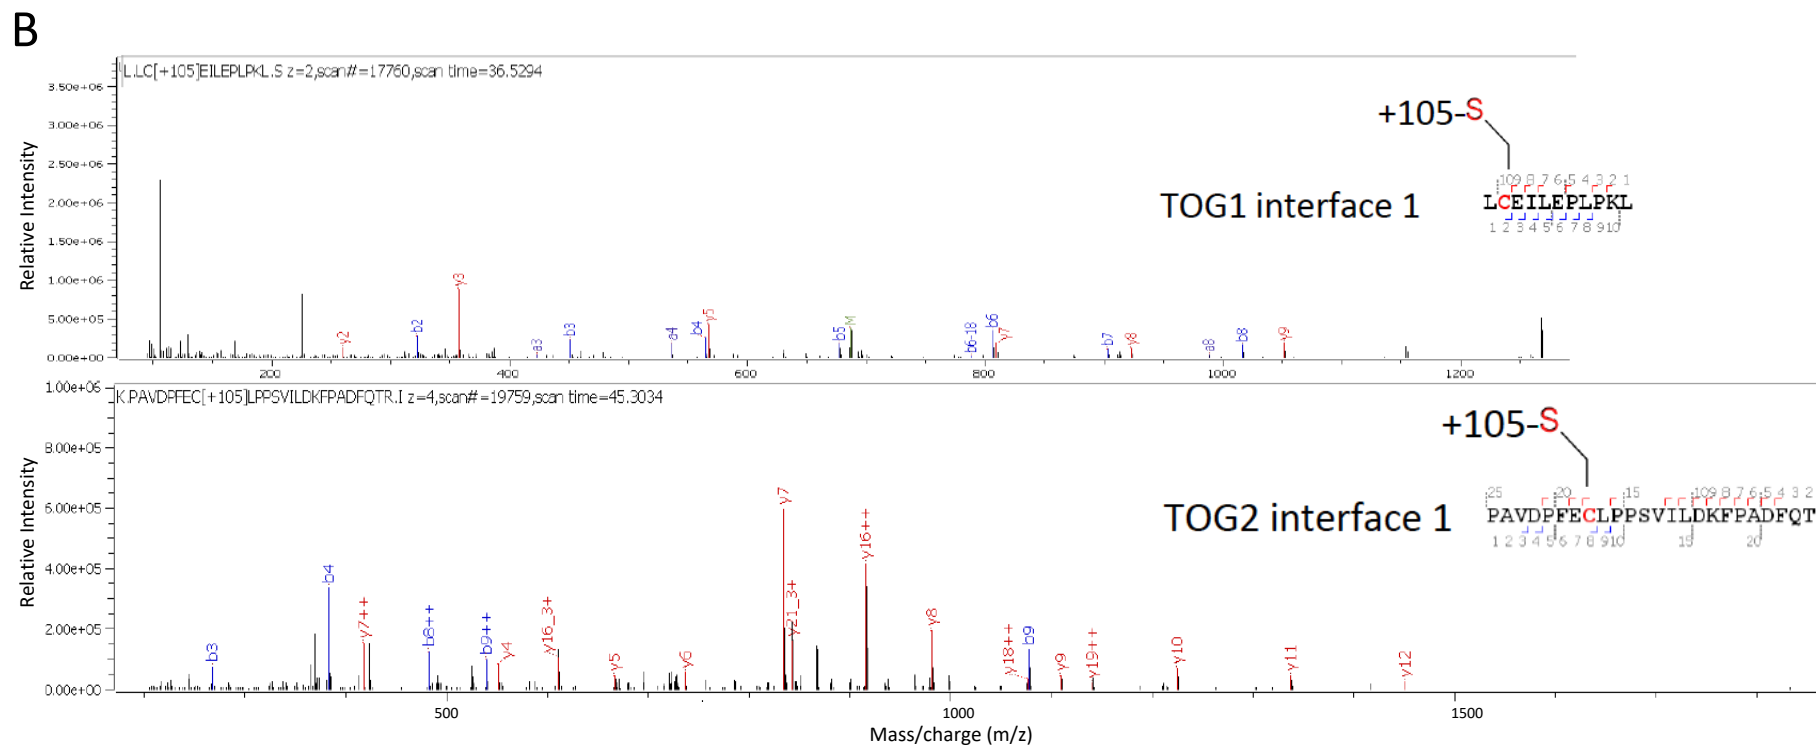

Supplement: supp [file elife_poa_e38922_Figure_3_figure_supplement_1.pdf › elife_poa_e38922_Figure_3_figure_supplement_1.pdf]

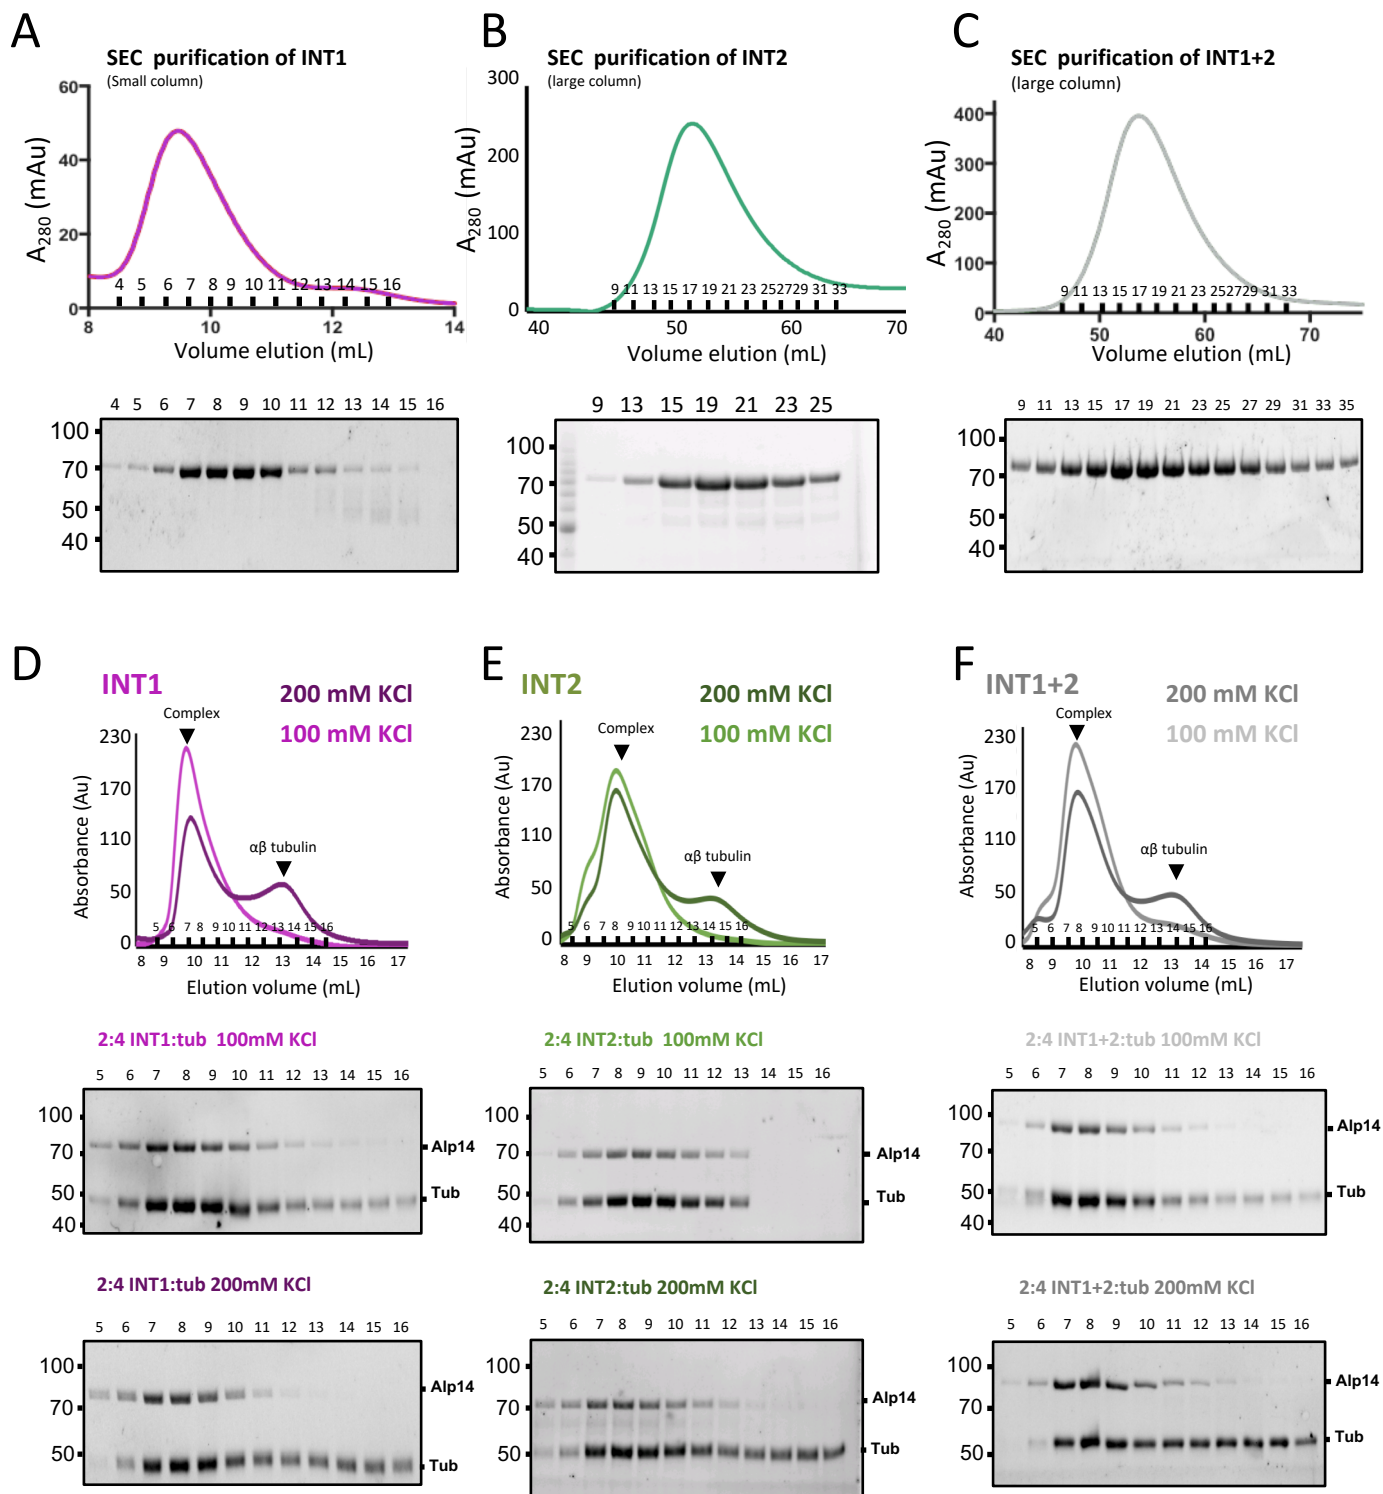

Supplement: supp [file elife_poa_e38922_Figure_4_figure_supplement_1.pdf › elife_poa_e38922_Figure_4_figure_supplement_1.pdf]

**A** WT-Alp14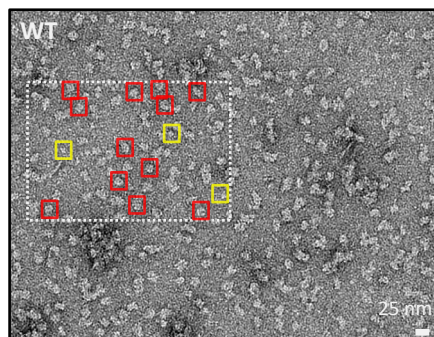**B**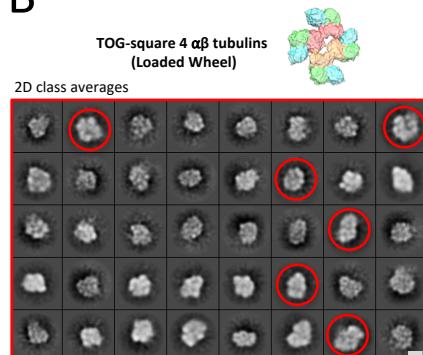**C**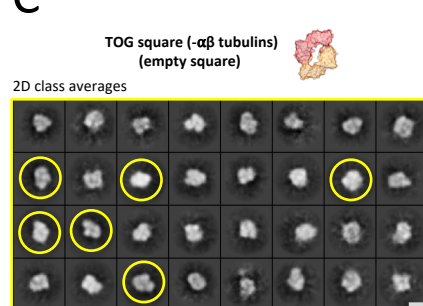**D** INT1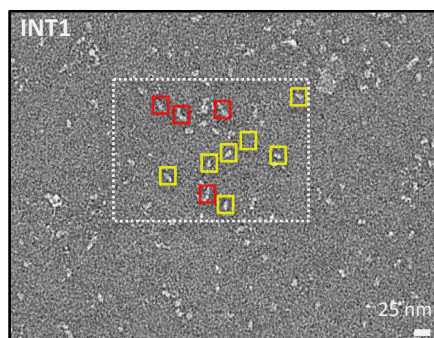**E**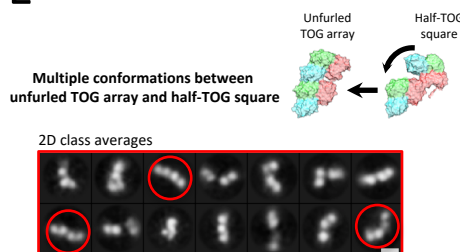**F**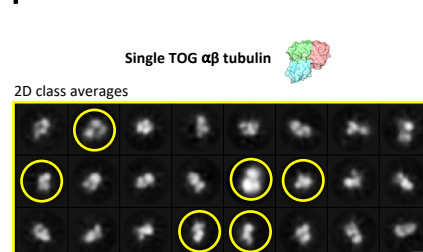**G** INT2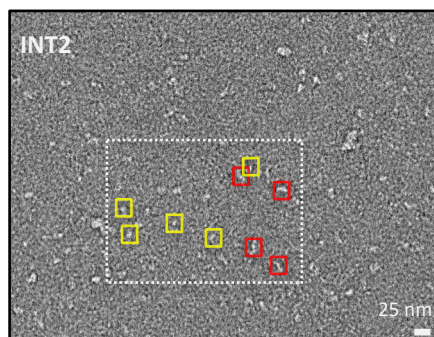**H**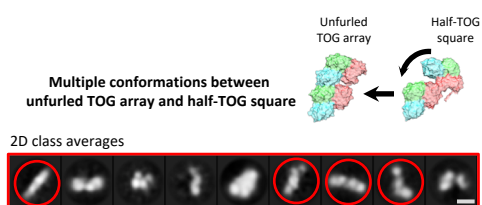**I**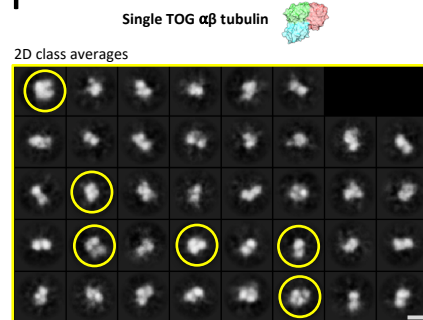**J** INT1+2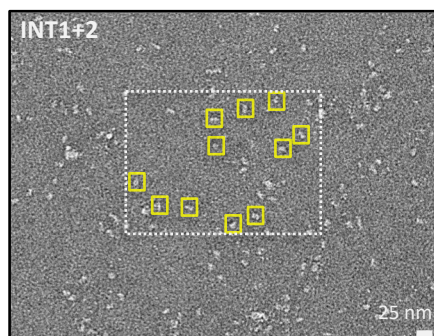**K**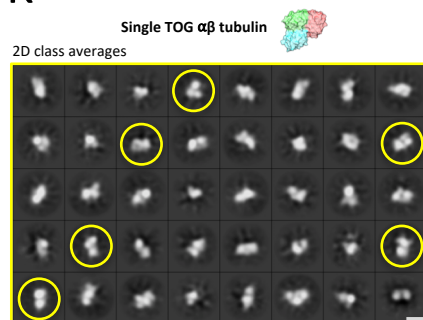

Supplement: supp [file elife_poa_e38922_Figure_4_figure_supplement_2.pdf › elife_poa_e38922_Figure_4_figure_supplement_2.pdf]

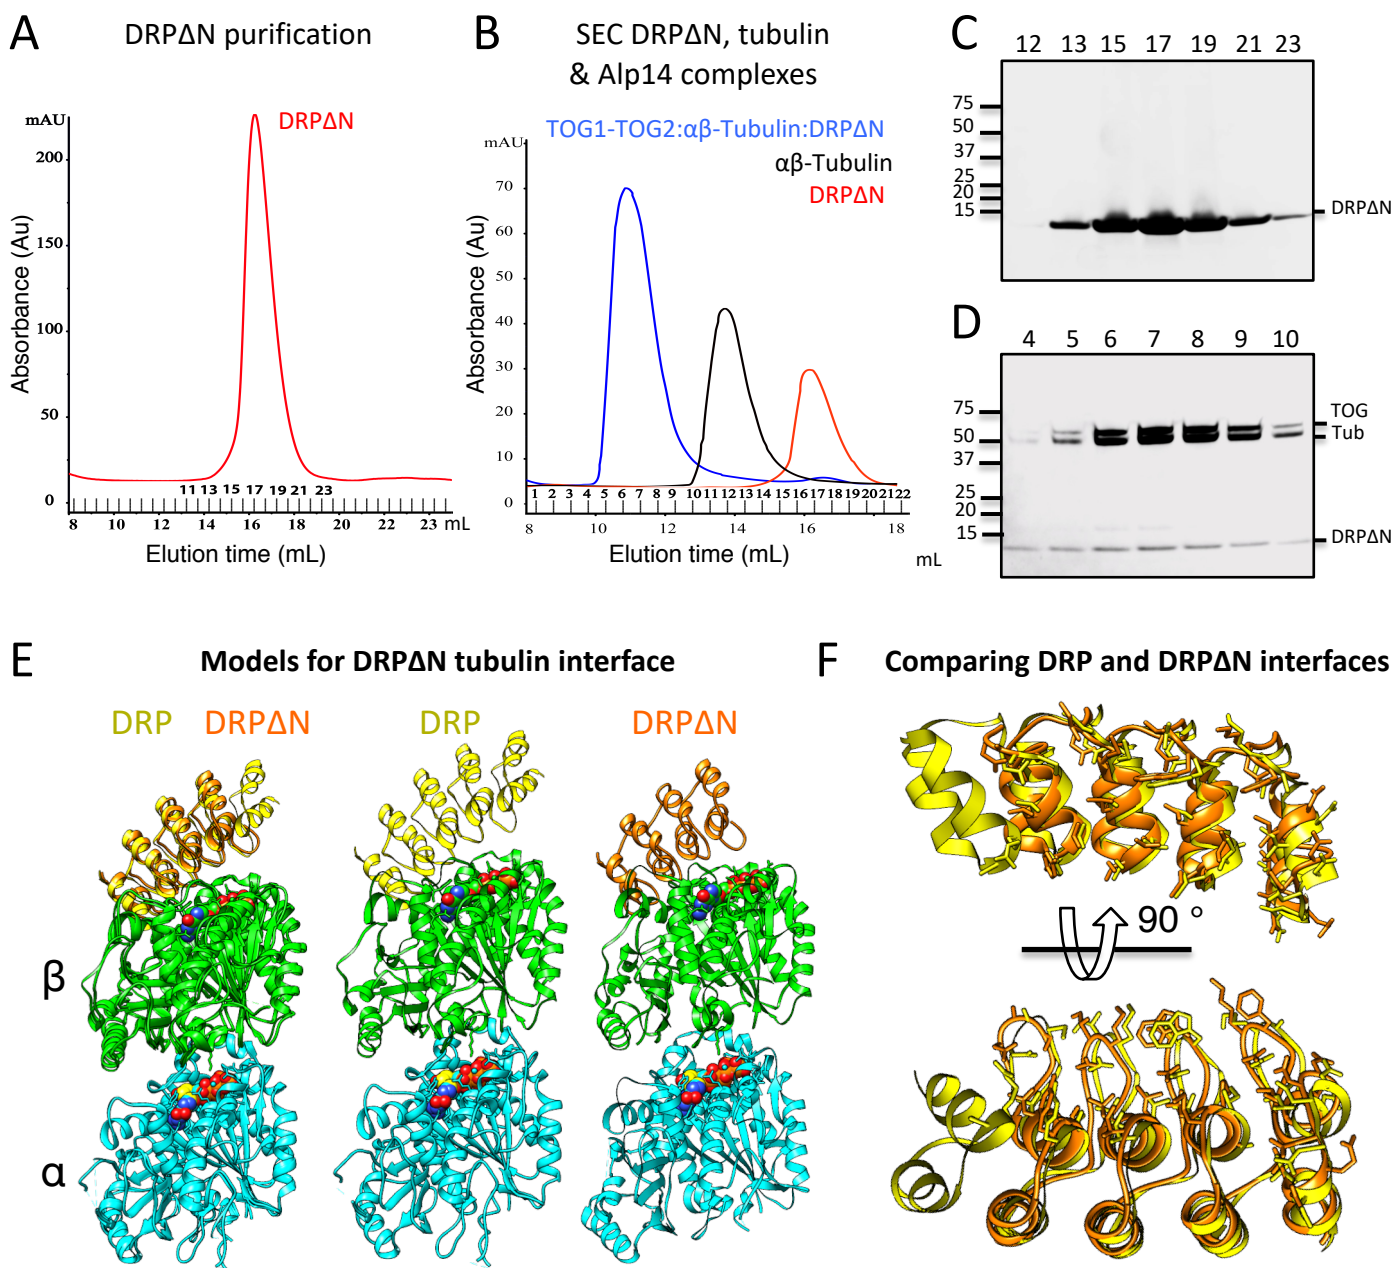

Supplement: supp [file elife_poa_e38922_Figure_5_figure_supplement_1.pdf › elife_poa_e38922_Figure_5_figure_supplement_1.pdf]

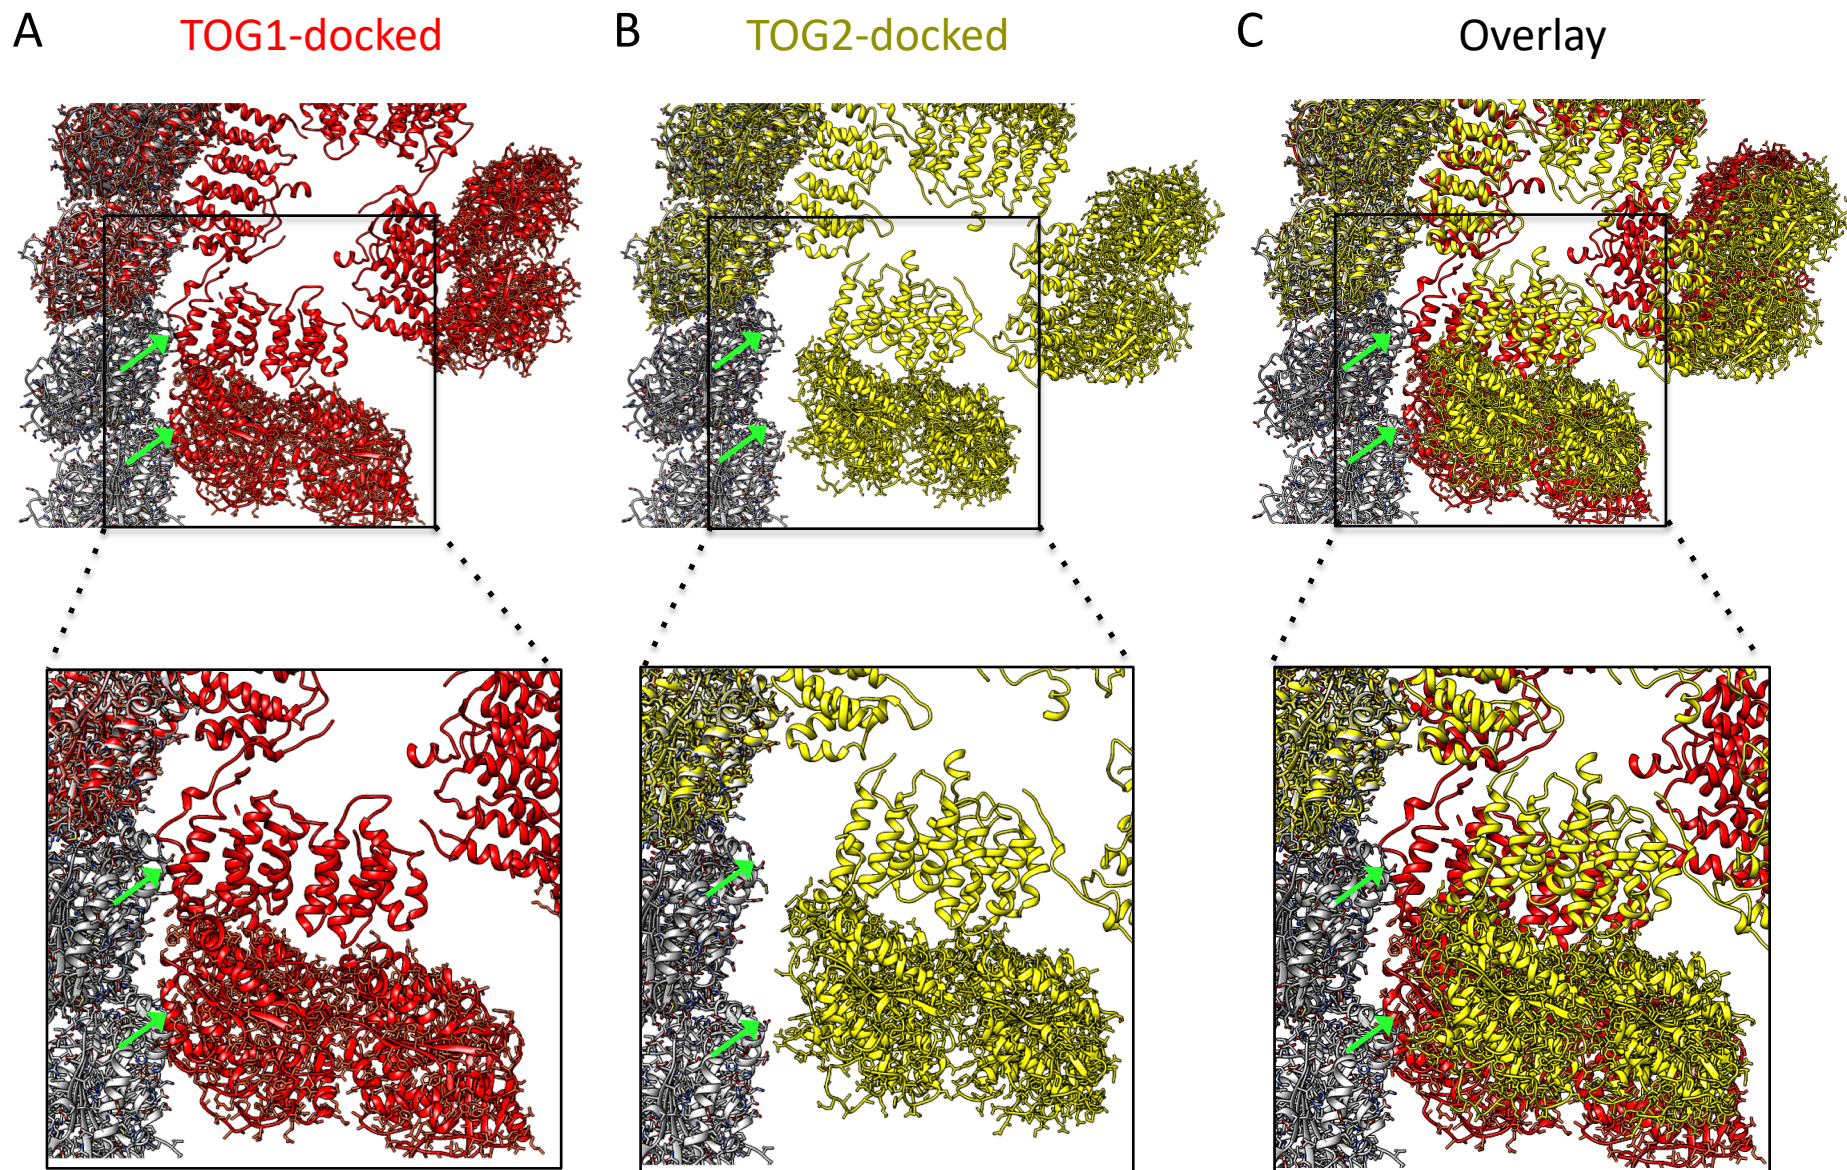

Supplement: supp [file elife_poa_e38922_Figure_7_figure_supplement_1.pdf › elife_poa_e38922_Figure_7_figure_supplement_1.pdf]
